# Supplementary material
Source: MDPI journal article supplement (https://www.mdpi.com/2297-8739/8/11/226)
Supplement: s1 [file s1]

**Table S1.** Molar composition of the prepolymerization mixtures used in the experimental design and resulting binding affinities of the corresponding nanoMIPs.

| Polymer | AA<br>%mol | tBAM<br>%mol | NIPAM<br>%mol | BIS<br>%mol | $K_{eq} \pm 1 \text{ s.e.}$<br>( $10^6 \text{ M}^{-1}$ ) |
|---------|------------|--------------|---------------|-------------|----------------------------------------------------------|
| P1      | 10         | 57           | 30            | 3           | $2.05 \pm 1.12$                                          |
| P2      | 20         | 46           | 30            | 4           | $2.44 \pm 0.68$                                          |
| P3      | 20         | 48           | 30            | 2           | $4.01 \pm 0.62$                                          |
| P4      | 30         | 35           | 30            | 5           | $3.99 \pm 0.57$                                          |
| P5      | 30         | 37           | 30            | 3           | $1.39 \pm 0.27$                                          |
| P6      | 30         | 39           | 30            | 1           | $3.00 \pm 0.75$                                          |
| P7      | 40         | 26           | 30            | 4           | $3.08 \pm 0.83$                                          |
| P8      | 40         | 28           | 30            | 2           | $0.63 \pm 0.76$                                          |
| P9      | 50         | 17           | 30            | 3           | $0.37 \pm 0.73$                                          |

**Table S2.** Non linear fitting of langmuirian binding models for ciprofloxacin-imprinted nanoMIPs.

| Polymer | $K_{eq} \pm 1 \text{ s.e.}$<br>( $10^6 \text{ M}^{-1}$ ) | $B_{max} \pm 1 \text{ s.e.}$<br>( $\text{nmol g}^{-1}$ ) | $r^2$ | Fit std. error | F-value |
|---------|----------------------------------------------------------|----------------------------------------------------------|-------|----------------|---------|
| P1      | $2.05 \pm 1.12$                                          | $8.3 \pm 2.1$                                            | 0.905 | 0.417          | 76.0    |
| P2      | $2.44 \pm 0.68$                                          | $7.6 \pm 1.1$                                            | 0.950 | 0.294          | 153.5   |
| P3      | $4.01 \pm 0.62$                                          | $8.8 \pm 0.7$                                            | 0.981 | 0.245          | 409.5   |
| P4      | $3.99 \pm 0.57$                                          | $5.4 \pm 0.3$                                            | 0.973 | 0.160          | 283.5   |
| P5      | $1.39 \pm 0.27$                                          | $10.7 \pm 1.4$                                           | 0.990 | 0.150          | 806.2   |
| P6      | $3.00 \pm 0.75$                                          | $18.8 \pm 2.9$                                           | 0.979 | 0.442          | 381.9   |
| P7      | $3.08 \pm 0.83$                                          | $9.5 \pm 1.4$                                            | 0.951 | 0.397          | 153.9   |
| P8      | $0.63 \pm 0.76$                                          | $19.8 \pm 20.8$                                          | 0.952 | 0.236          | 153.5   |
| P9      | $0.37 \pm 0.73$                                          | $43.8 \pm 77.8$                                          | 0.920 | 0.583          | 91.48   |

**Table S3.** Non linear fitting of 6-parameters polynomial model for the two-factor central composite (d=2, n=9) experimental design.

Model:  $z = a_0 + a_1x + a_2y + a_3x^2 + a_4y^2 + a_5xy$  ( $r^2 = 0.921$ , fit std. error = 0.607, F-value = 6.980)

| Parameters | value $\pm 1 \text{ s.e.}$ | t-value | P      |
|------------|----------------------------|---------|--------|
| $a_0$      | $15.686 \pm 3.697$         | 4.243   | 0.0240 |
| $a_1$      | $-5.792 \pm 1.351$         | -4.287  | 0.0233 |
| $a_2$      | $-0.322 \pm 0.140$         | -2.304  | 0.1046 |
| $a_3$      | $0.496 \pm 0.150$          | 3.306   | 0.0455 |
| $a_4$      | $-0.001 \pm 0.001$         | -0.381  | 0.7287 |
| $a_5$      | $0.101 \pm 0.033$          | 3.073   | 0.0544 |

| Polymer | z value ( $K_{eq}$ ) | z predicted | Residual | Residual % |
|---------|----------------------|-------------|----------|------------|
| P1      | 2.05                 | 2.54        | -0.49    | 23.8       |
| P2      | 2.44                 | 1.89        | 0.55     | 22.4       |
| P3      | 4.01                 | 3.47        | 0.54     | 13.5       |
| P4      | 3.99                 | 4.14        | -0.15    | -3.7       |
| P5      | 1.39                 | 1.71        | -0.32    | -22.7      |
| P6      | 3.00                 | 3.24        | -0.24    | -8.00      |
| P7      | 3.08                 | 2.84        | 0.24     | 7.70       |
| P8      | 0.63                 | 0.36        | 0.26     | 41.7       |
| P9      | 0.37                 | 0.39        | -0.02    | -5.31      |

**Table S4.** Recovery of ciprofloxacin in human urine after dilution 9 + 1 v/v with 50 mmol L<sup>-1</sup> MES buffer, pH 4.5 and MISPE. t-values for pairwise comparison of samples at different concentration.

| $\mu\text{g mL}^{-1}$ | 0.2   | 0.5   | 1.0   | 1.5   | 2.0   |
|-----------------------|-------|-------|-------|-------|-------|
| 0.2                   | -     | 0.432 | 0.821 | 0.477 | 0.910 |
| 0.5                   | 0.432 | -     | 0.316 | 0.938 | 0.290 |
| 1.0                   | 0.821 | 0.316 | -     | 0.352 | 0.880 |
| 1.5                   | 0.477 | 0.938 | 0.352 | -     | 0.334 |
| 2.0                   | 0.910 | 0.290 | 0.880 | 0.334 | -     |
